# Supplementary material for: Data-Driven Dietary Patterns, Nutrient Intake and Body Weight Status in a Cross-Section of Singaporean Children Aged 6–12 Years
Source: MDPI journal article supplement (doi:10.3390/nu13041335), 2021-04-17
Supplement: s1 [file s1]

**Supplementary Table S1.** List of Food Groups included in cluster analysis.

| Food Group No. | Name of Food Group                                                   |
|----------------|----------------------------------------------------------------------|
| 1              | Sweetened beverages*                                                 |
| 2              | Unsweetened beverages*                                               |
| 3              | Biscuits, cakes and pastries                                         |
| 4              | Breads and rolls                                                     |
| 5              | Breakfast cereals                                                    |
| 6              | Buns (including baked, steamed, plain, and with sweet fillings)      |
| 7              | Grains and noodles                                                   |
| 8              | Hen eggs                                                             |
| 9              | Other eggs (e.g., Quail eggs, duck eggs, salted and century)         |
| 10             | Fast foods                                                           |
| 11             | Crustaceans, shellfish and other seafoods (e.g., squids, algae, etc) |
| 12             | Fish and roe                                                         |
| 13             | Fresh fruits                                                         |
| 14             | Processed fruits (e.g., canned, pickled, juices, etc)                |
| 15             | Red meat (e.g., beef, veal, mutton, lamb)                            |
| 16             | White meat (e.g., poultry, duck, frog)                               |
| 17             | Cheeses                                                              |
| 18             | Ice creams                                                           |
| 19             | Milks                                                                |
| 20             | Yoghurts and yoghurt drinks                                          |
| 21             | Sauces, gravies, dressings and dips                                  |
| 22             | Herbs, spices and condiments                                         |
| 23             | Soups (manufactured)                                                 |
| 24             | Stock cubes/ flavourings, essence, yeast extracts, etc)              |
| 25             | Fish and seafood-based dishes                                        |
| 26             | Local cakes, desserts and snacks                                     |
| 27             | Pulses-based dishes                                                  |
| 28             | Red meat-based dishes                                                |
| 29             | Vegetable-based dishes                                               |
| 30             | White meat-based dishes                                              |
| 31             | Nuts and seeds, pulses and products                                  |
| 32             | Oils and fats                                                        |
| 33             | Sugars, sweets and confectionary                                     |
| 34             | Leafy and non-leafy vegetables                                       |
| 35             | Legumes (e.g., fresh beans, peas in pods)                            |
| 36             | Starchy roots, tubers, corns and stems                               |
| 37             | Supplements                                                          |

\*The “beverages” food group was modified to differentiate between “sweetened beverages” and “unsweetened beverages”.
